# Supplementary material for: Effects of functional correction training on injury risk of athletes: a systematic review and meta-analysis
Source: PeerJ journal article supplement (doi:10.7717/peerj.11089), 2021-03-25

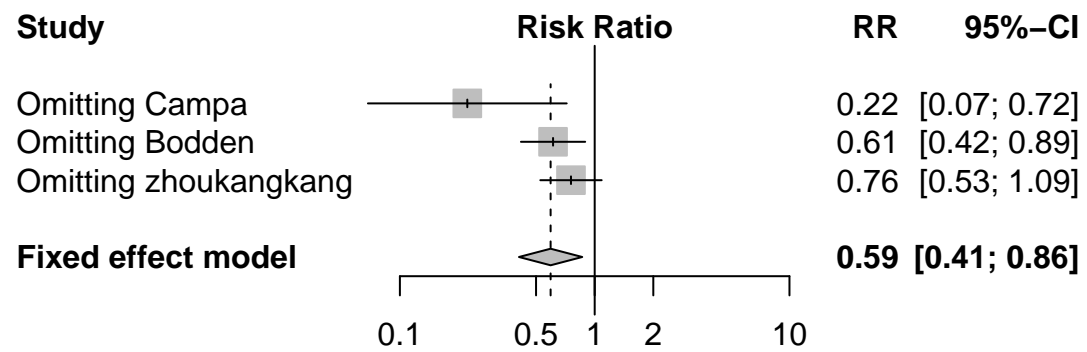

Supplement: Supporting_Figure_S4_.pdf [file Supporting_Figure_S4_.pdf]
